# Supplementary material for: Cross-sectional structure evolution of phase-separated spin-coated ethylcellulose/hydroxypropylcellulose films during solvent quenching
Source: Royal Society of Chemistry journal article supplement (doi:10.1039/d2ra04178b), 2022-01-01
Supplement: d2ra04178b1.pdf [file d2ra04178b1.pdf]

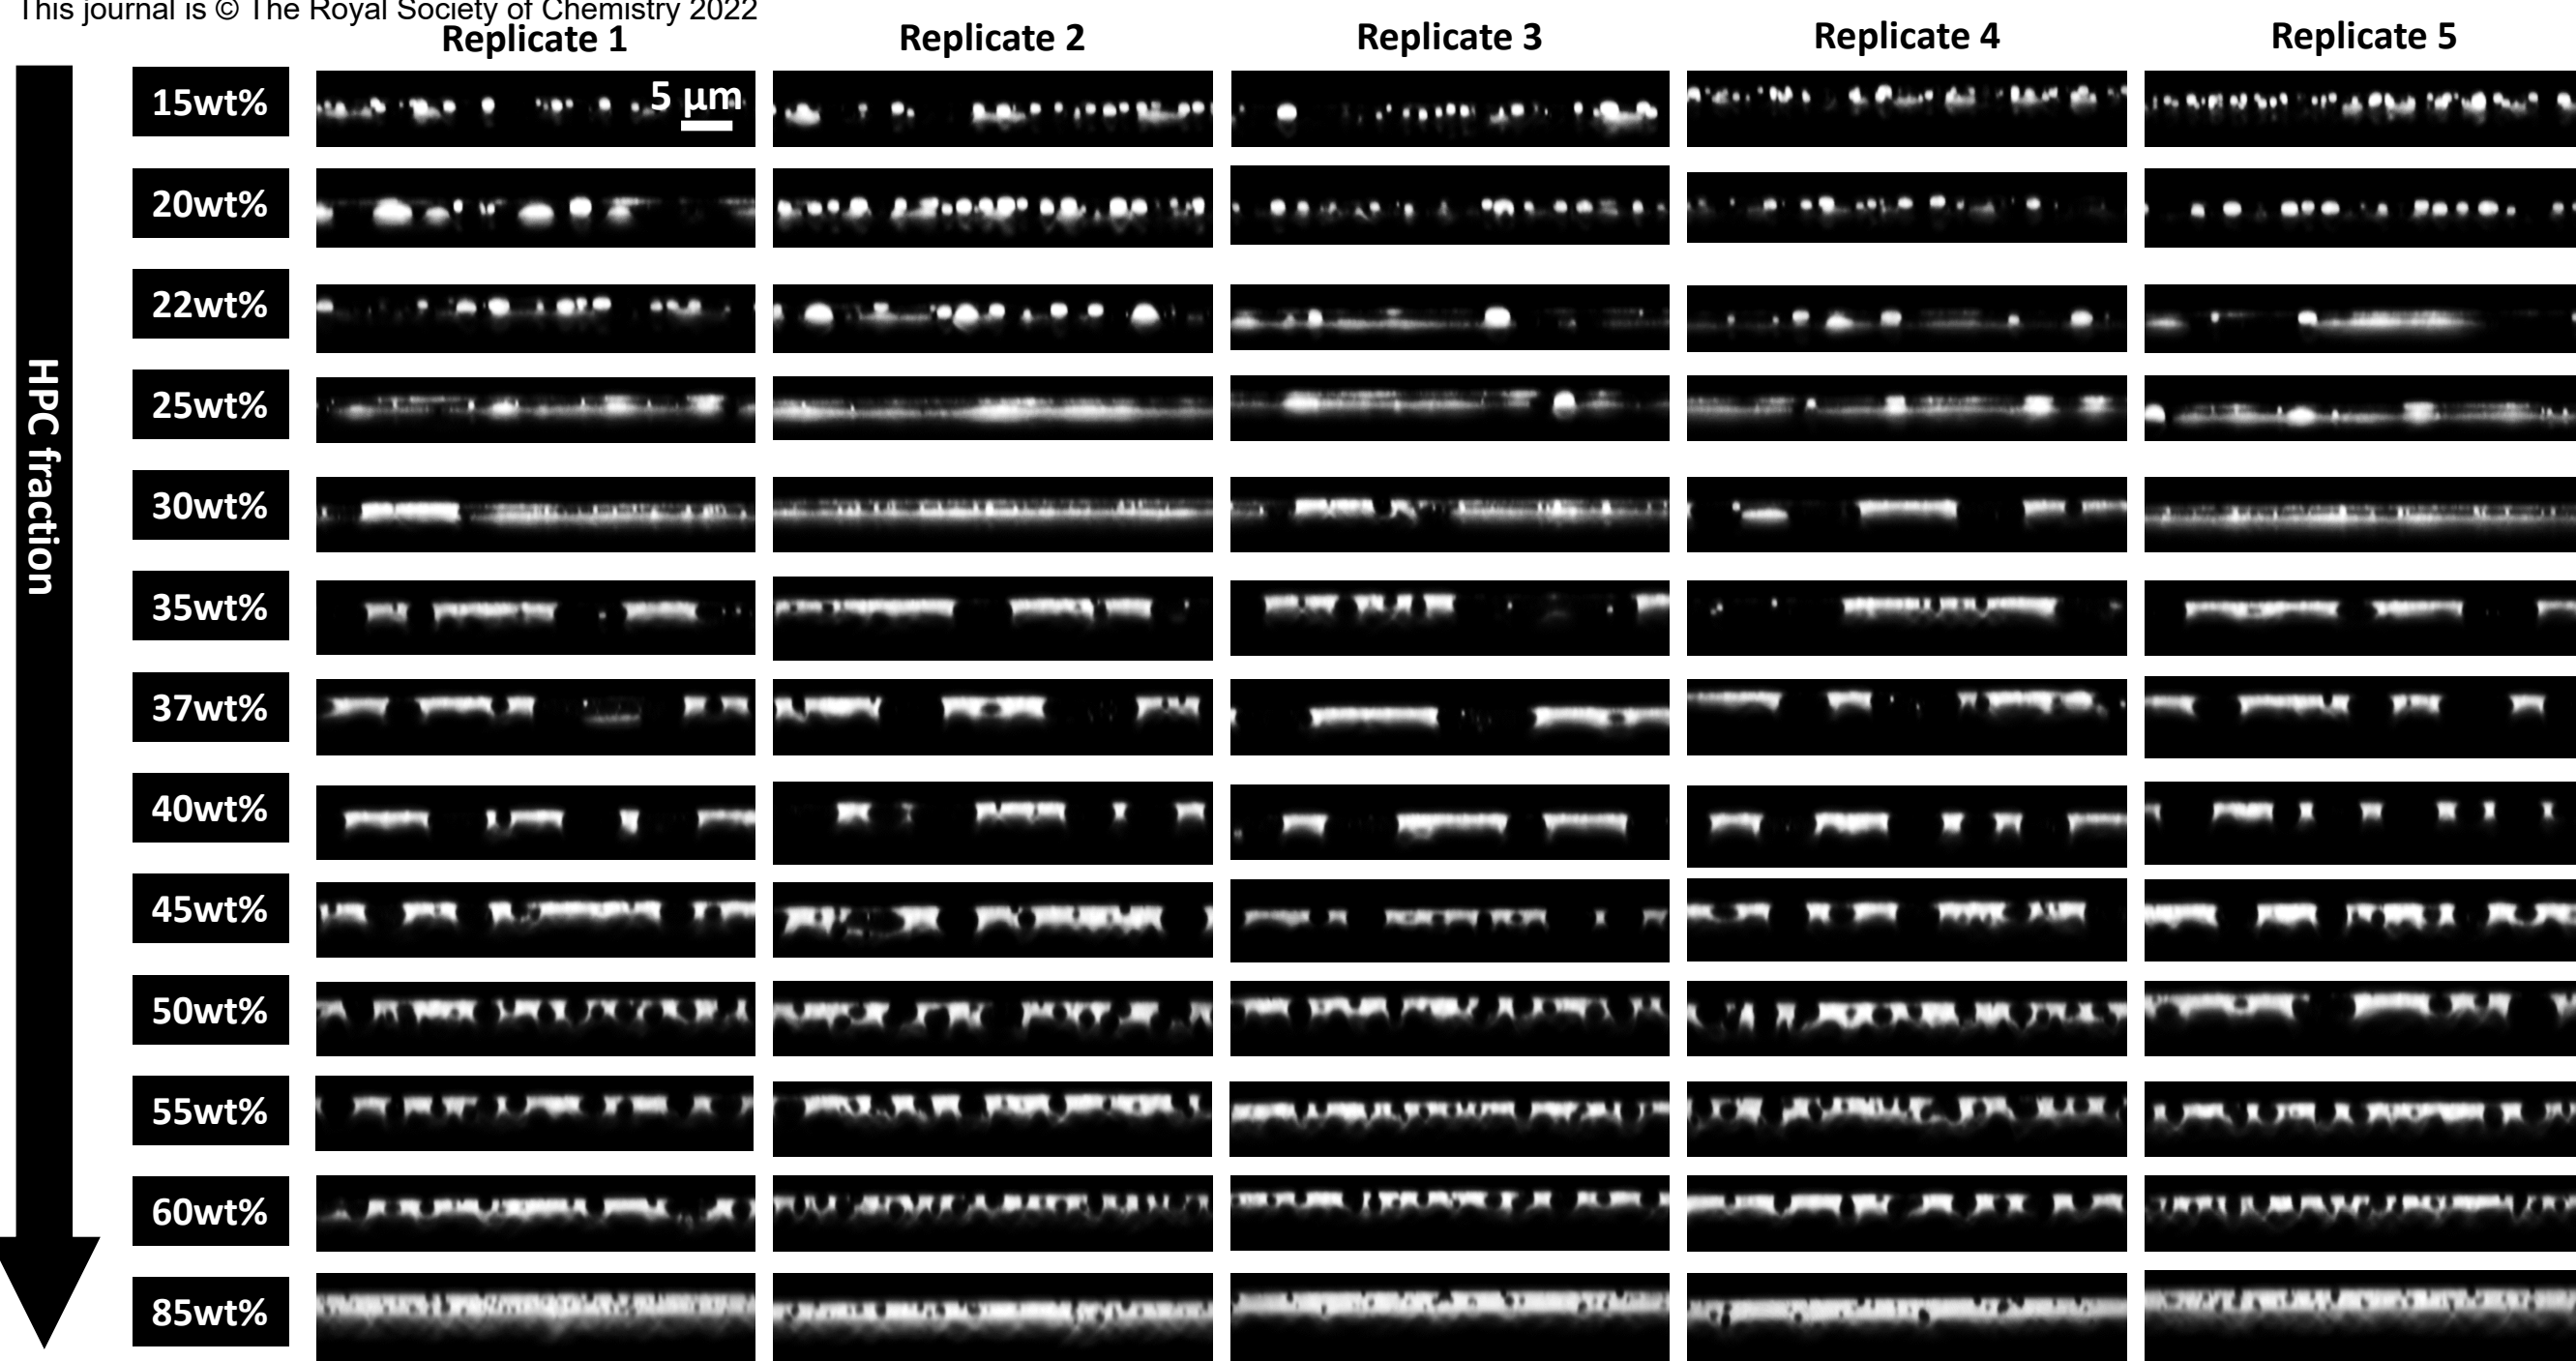

**ESI 1.** CLSM micrograph replicates of the cross-sectional structures of the EC/HPC films for the 13 EC/HPC ratio one week after spinning. The bright phase is HPC, and the dark phase is EC. Air surface is towards the bottom and the substrate is towards the top in each cross section. This Figure is supplementary information to Figure 9b.
